# Supplementary material for: The power of single molecule real-time sequencing technology in the de novo assembly of a eukaryotic genome
Source: PubMed Central journal article supplement (PMC4663752; doi:10.1038/srep16780), 2015-11-30

## **The power of single molecule real-time sequencing technology in the *de novo* assembly of a eukaryotic genome**

Hiroaki Sakai<sup>1</sup>, Ken Naito<sup>2\*</sup>, Eri Ogiso-Tanaka<sup>2</sup>, Yu Takahashi<sup>2</sup>, Kohtaro Iseki<sup>2</sup>, Chiaki Muto<sup>2</sup>, Kazuhito Satou<sup>3</sup>, Kuniko Teruya<sup>3</sup>, Akino Shiroma<sup>3</sup>, Makiko Shimoji<sup>3</sup>, Takashi Hirano<sup>3</sup>, Takeshi Itoh<sup>1</sup>, Akito Kaga<sup>2</sup>, and Norihiko Tomooka<sup>2</sup>

<sup>1</sup>Agrogenomics Research Center, National Institute of Agrobiological Sciences, 2-1-2 Kannondai, Tsukuba, Ibaraki, 305-8602, Japan. <sup>2</sup>Genetic Resources Center, National Institute of Agrobiological Sciences, 2-1-2 Kannondai, Tsukuba, Ibaraki, 305-8602, Japan. <sup>3</sup>Okinawa Institute of Advanced Sciences, Uruma, 904-2234, Japan.

Correspondence should be addressed to Ken Naito (knaito@affrc.go.jp).

## Assembly\_1

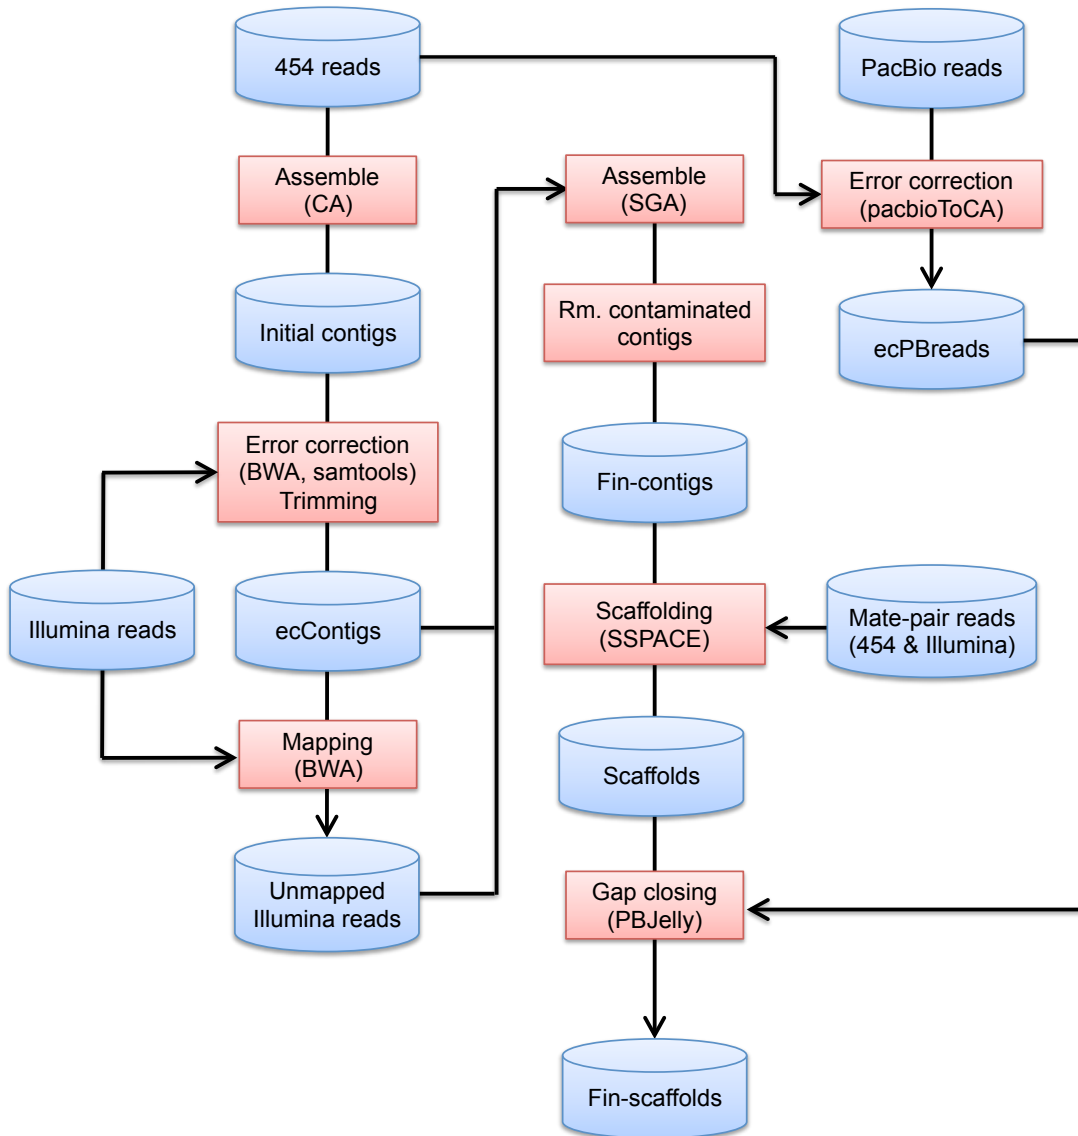

## Assembly\_2

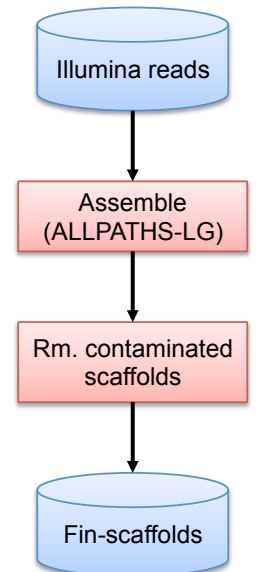

**Supplementary Figure 1. Assembly flows of Assembly\_1 and Assembly\_2.** Blue drums indicate sequence data, whereas red boxes indicate assembly tools. CA: Celera Assembler. SGA: String Graph Assembler. ecContigs: error-corrected contigs. ecPBreads: error-corrected PacBio reads. Rm: remove. Fin-contigs: final contigs. Fin-scaffolds: final scaffolds.

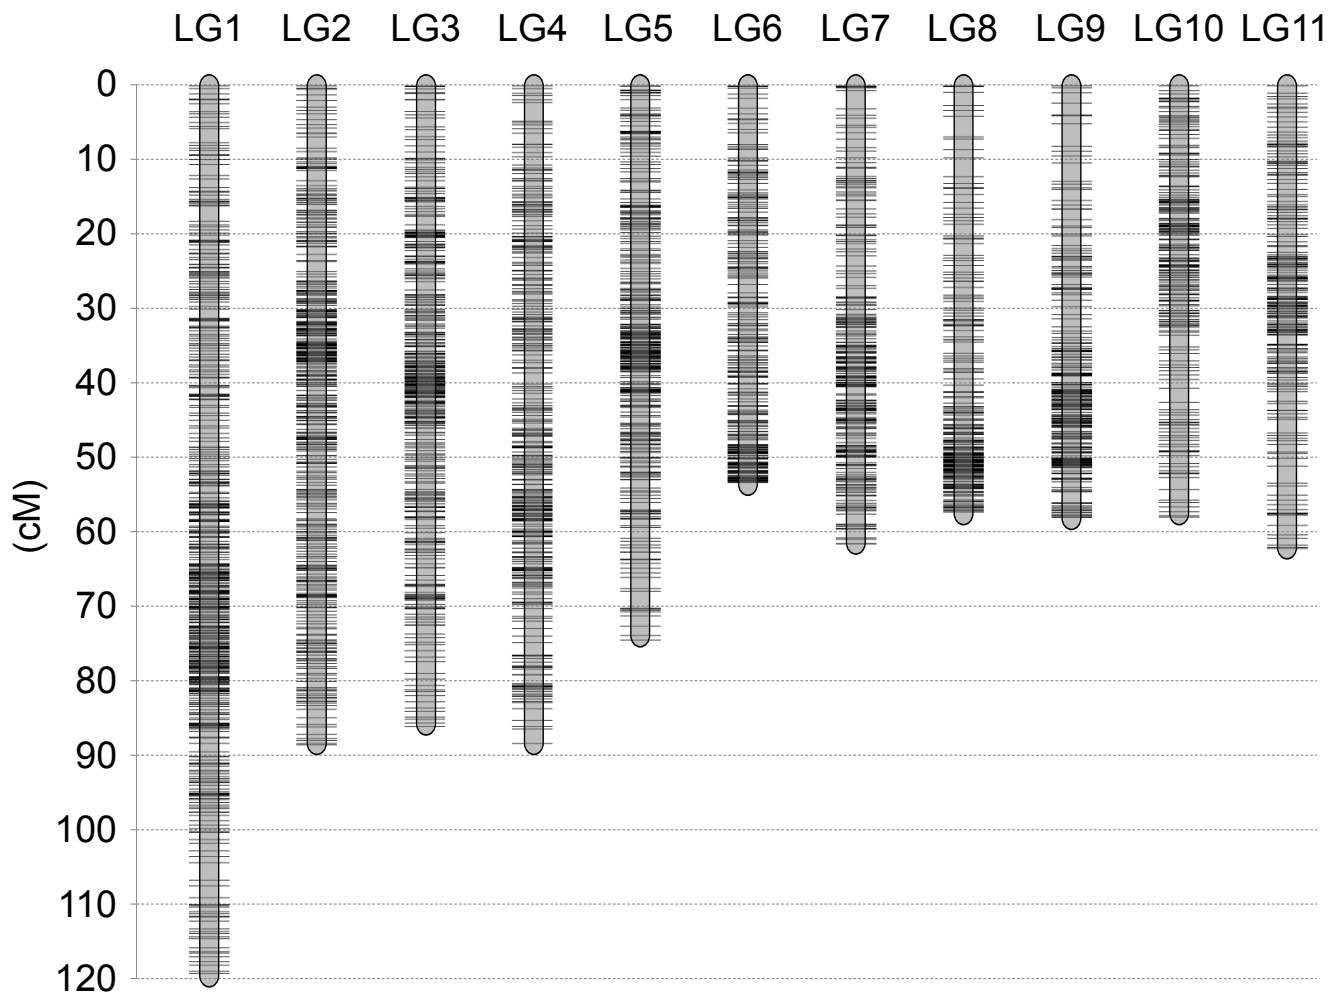

**Supplementary Figure 2. A high-density genetic linkage map of the azuki bean.** In total, 4,912 marker loci were genotyped in 995 F<sub>2</sub> plants derived from azuki bean x *V. nepalensis*.

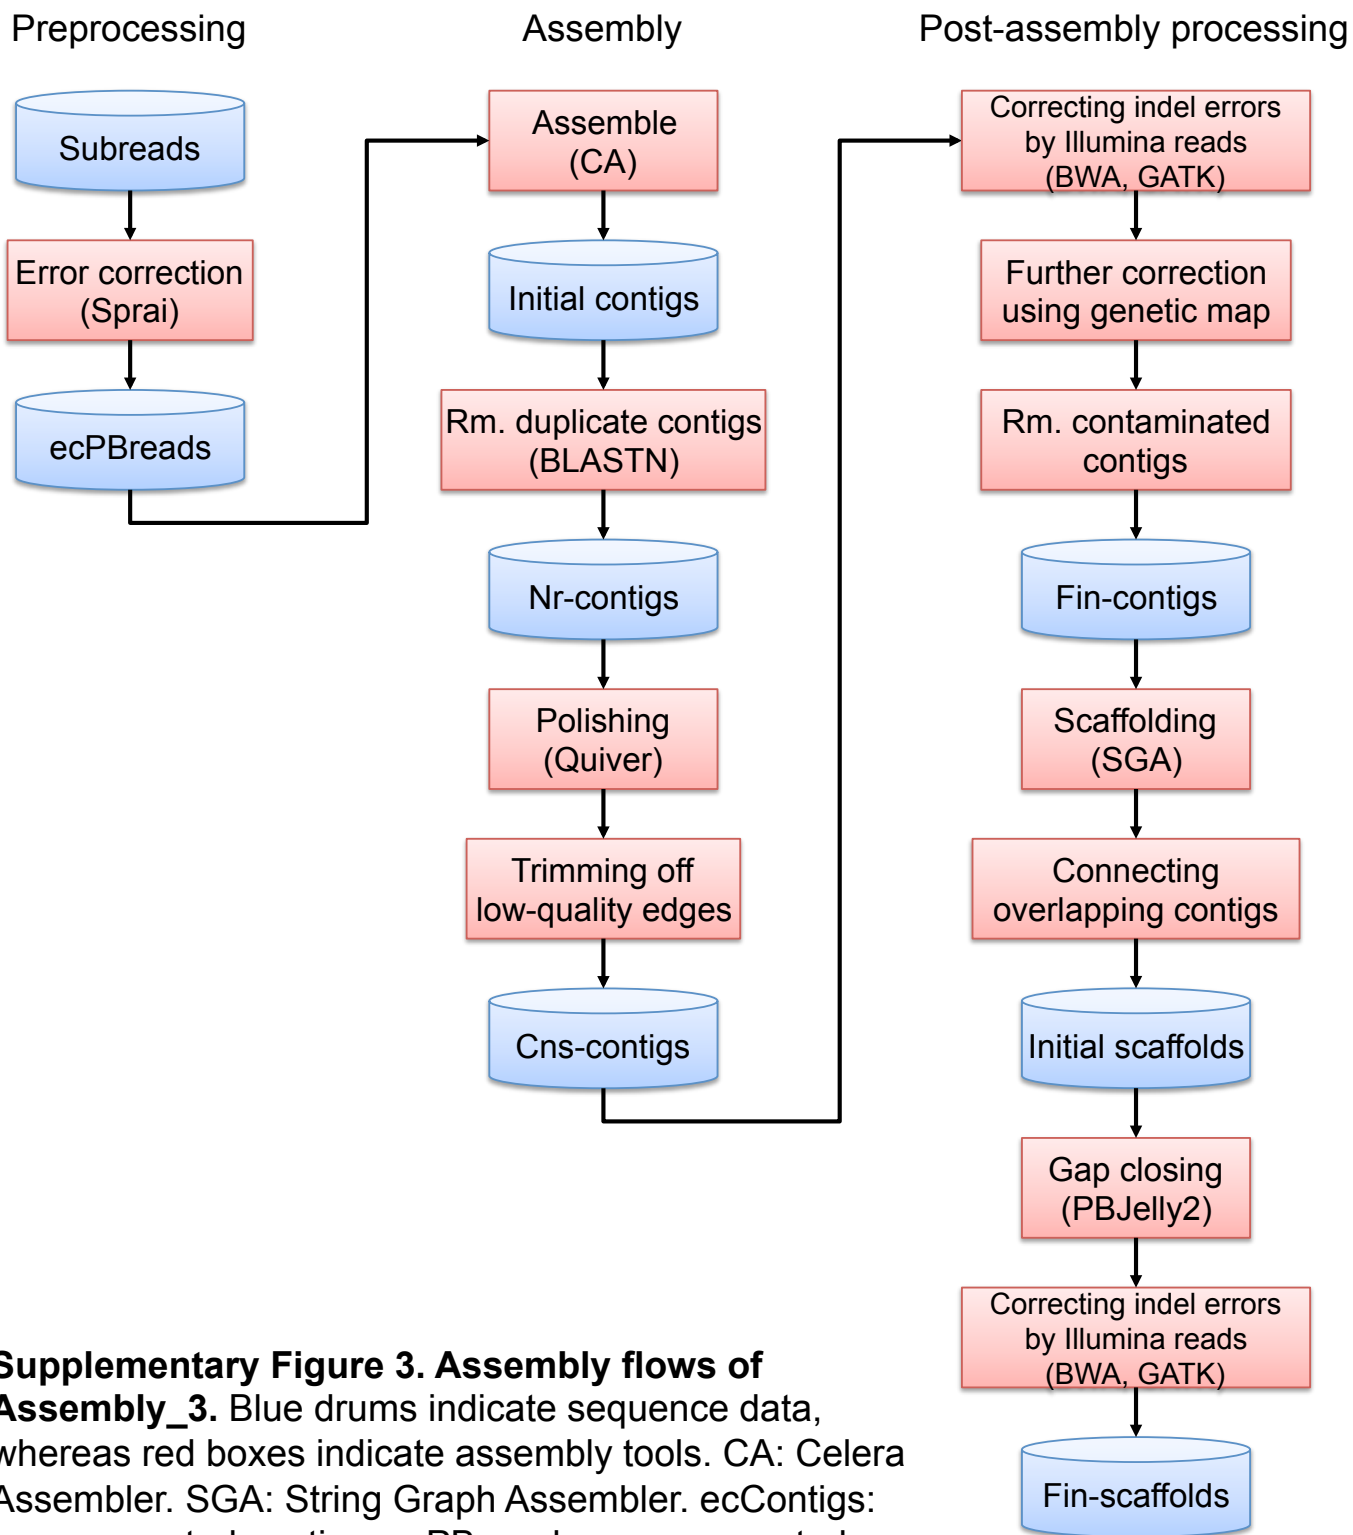

**Supplementary Figure 3. Assembly flows of Assembly\_3.** Blue drums indicate sequence data, whereas red boxes indicate assembly tools. CA: Celera Assembler. SGA: String Graph Assembler. ecContigs: error-corrected contigs. ecPB reads: error-corrected PacBio reads. Rm: remove. Nr-contigs: non-redundant contigs. Cns-contigs: consensus contigs. Fin-contigs: final contigs. Fin-scaffolds: final scaffolds.

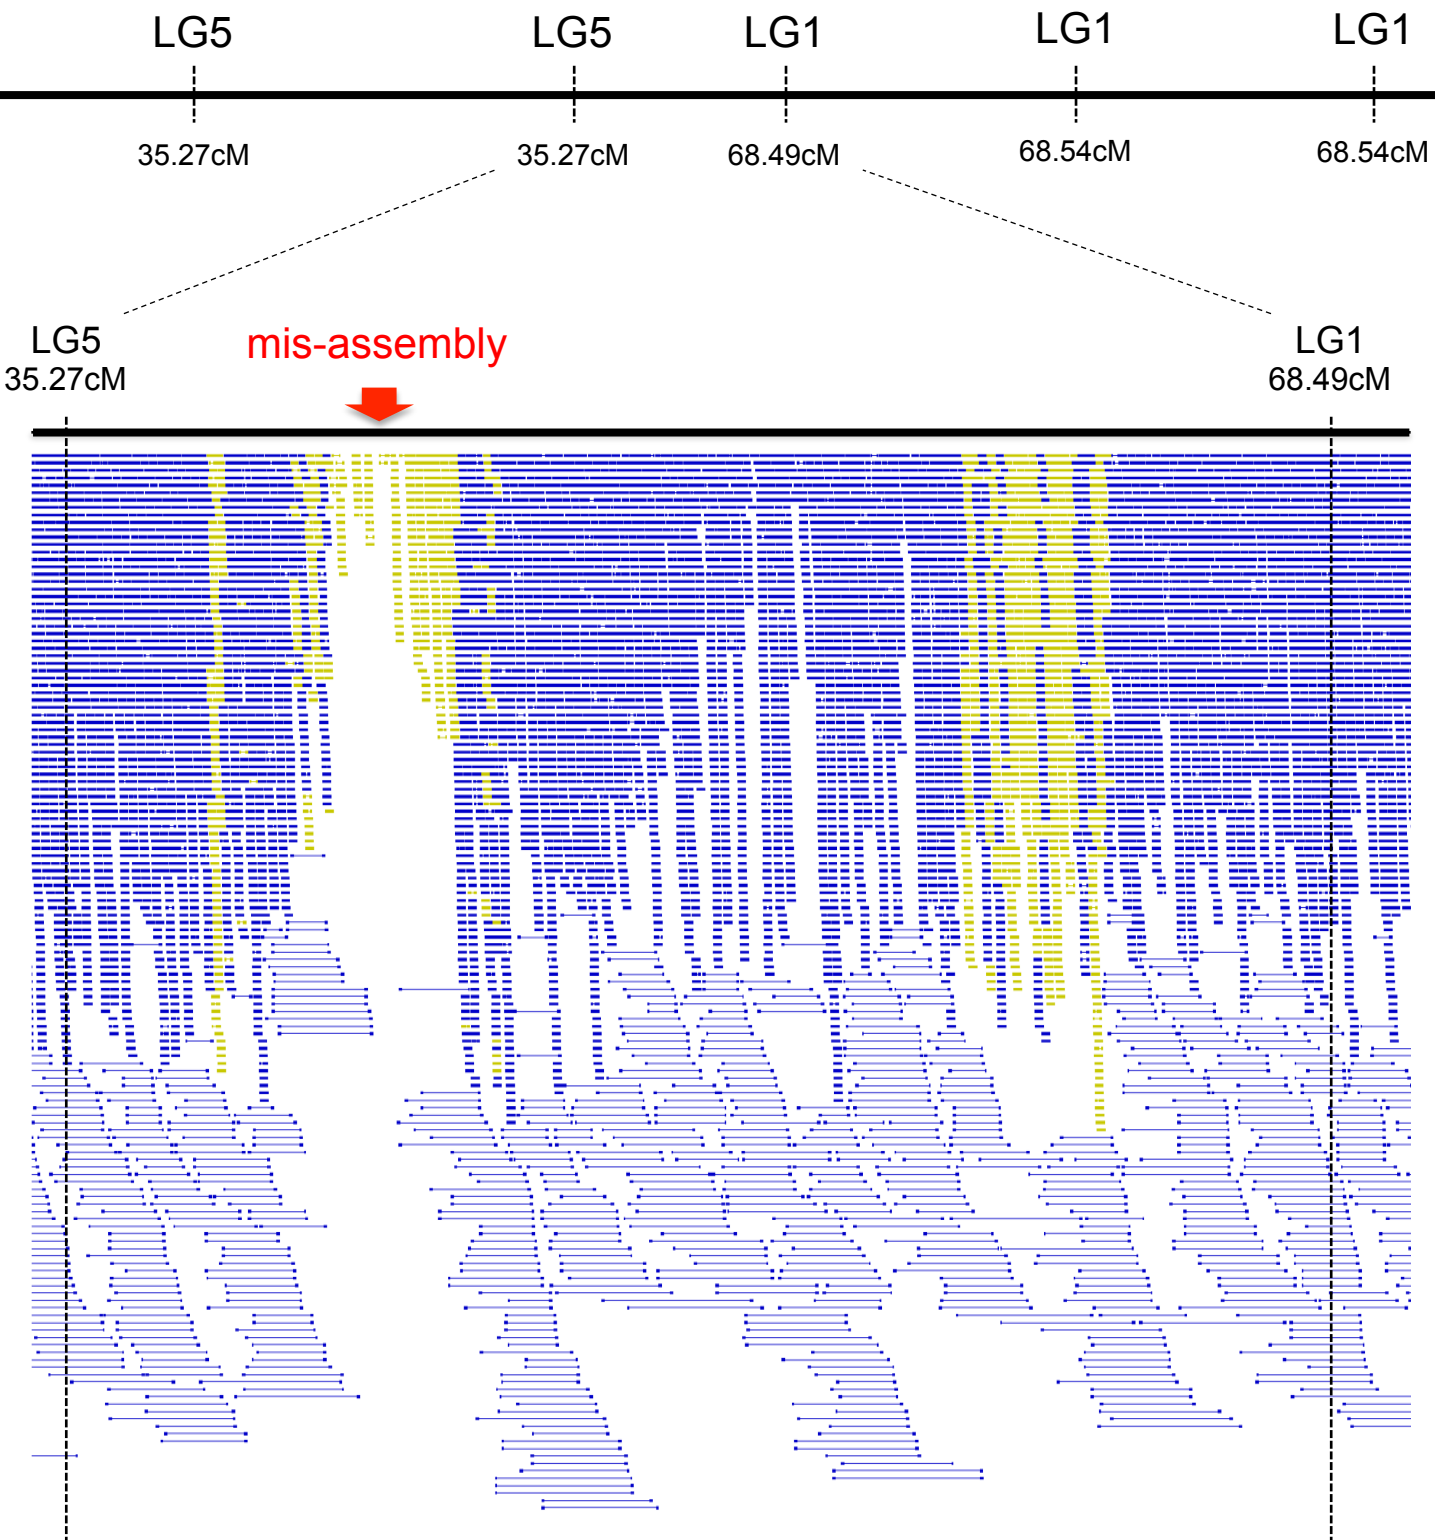

**Supplementary Figure 4. A selection of misassembly sites.** In this contig, DNA markers on LG1 and LG5 were present. Blue thick lines indicate the uniquely mapped paired-end reads with 250 bp inserts 250 bp, while the blue dots bridged with thin lines indicate those of 3 kb inserts. The yellow lines indicate the reads with multiple hits.

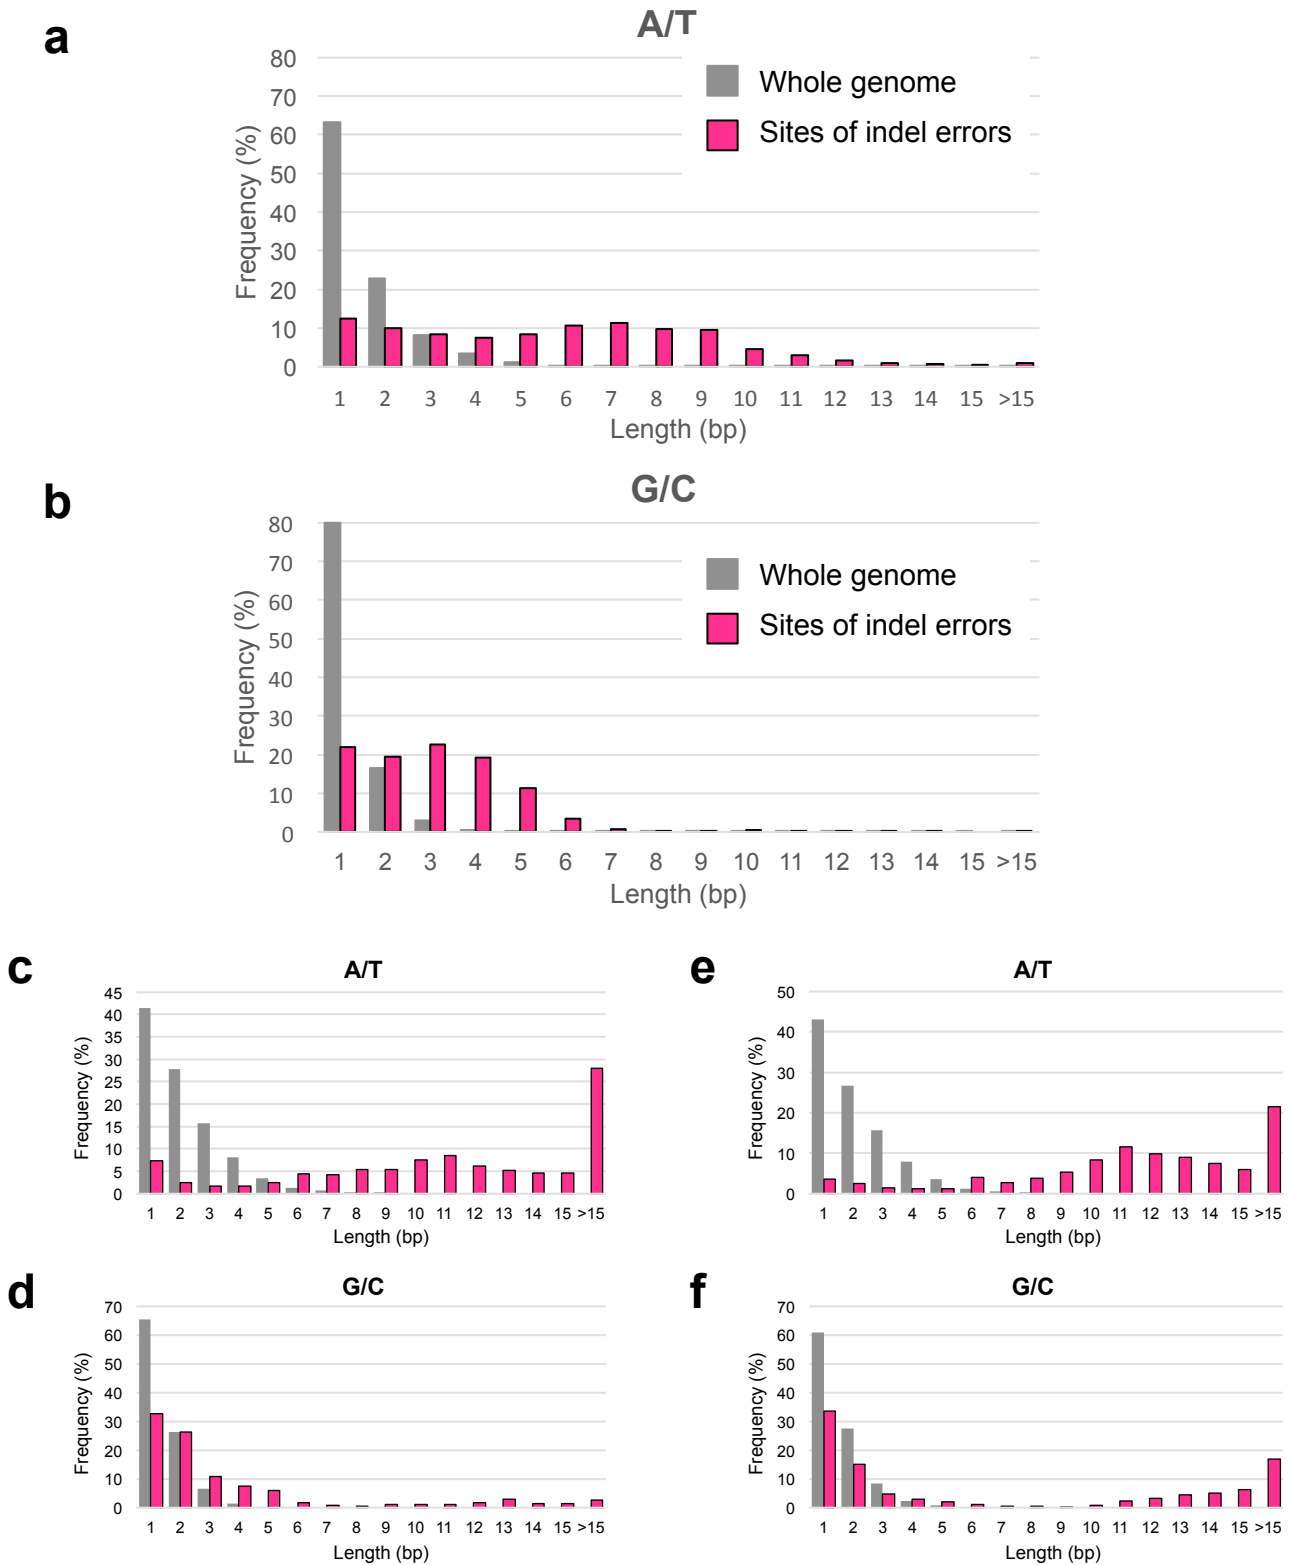

**Supplementary Figure 5. Frequency of homopolymer length at indel-errors in PacBio assemblies. (a)** Homopolymers of A/T or **(b)** Homopolymers of G/C in the azuki bean genome. Gray bars indicate frequency of homopolymers in the whole assembled sequences as a control. **(c)(d)** *Arabidopsis thaliana*. **(e)(f)** *Drosophila melanogaster*.

Supplementary Table 3. Summary of pseudomolecules in the Assembly\_3.

|          | No. of scaffolds | Total scaffolds length | Pseudomolecule length |
|----------|------------------|------------------------|-----------------------|
| Chr01    | 35               | 65,919,377             | 67,115,795            |
| Chr02    | 28               | 45,096,540             | 45,515,668            |
| Chr03    | 27               | 41,962,598             | 43,462,759            |
| Chr04    | 25               | 53,470,133             | 54,073,736            |
| Chr05    | 25               | 36,897,451             | 37,380,367            |
| Chr06    | 23               | 38,789,640             | 38,860,970            |
| Chr07    | 20               | 32,020,224             | 33,495,452            |
| Chr08    | 32               | 46,426,616             | 46,951,433            |
| Chr09    | 26               | 35,726,726             | 37,388,052            |
| Chr10    | 17               | 28,785,286             | 28,886,040            |
| Chr11    | 21               | 37,398,860             | 38,115,440            |
| Unmapped | 2250             | 51,515,385             | -                     |

## Gene Density (Genes/Mb)

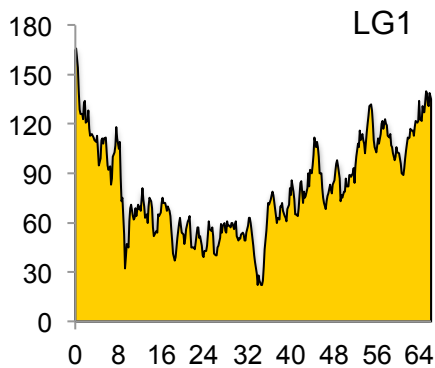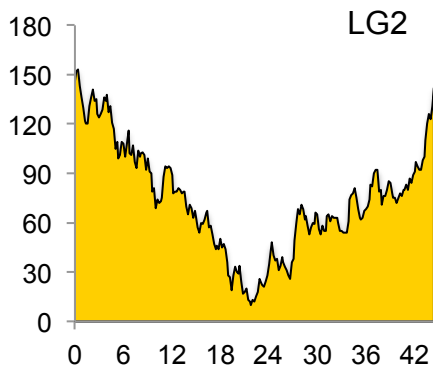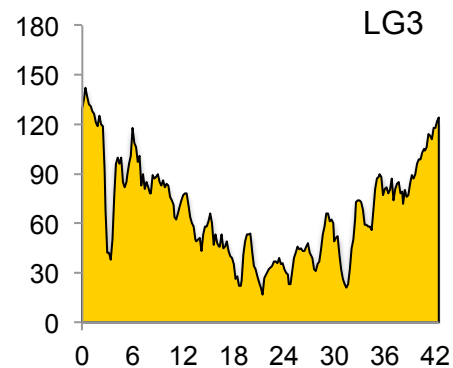

## Repeat Rate/Mb

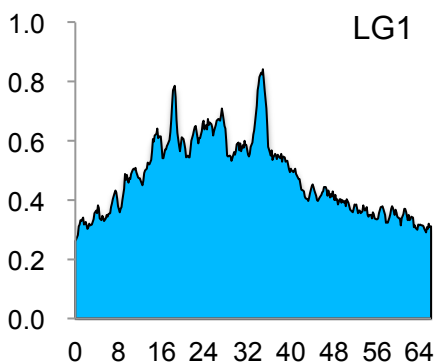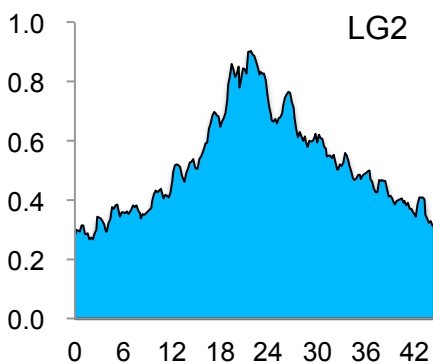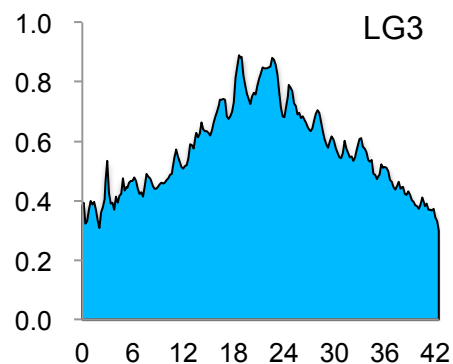

## Recombination Frequency (cM/Mb)

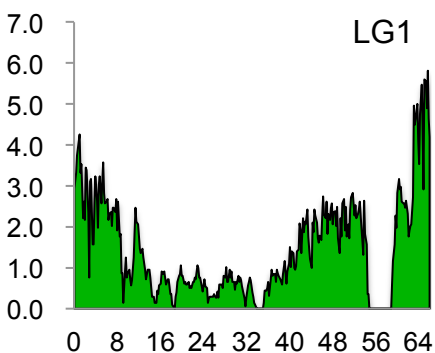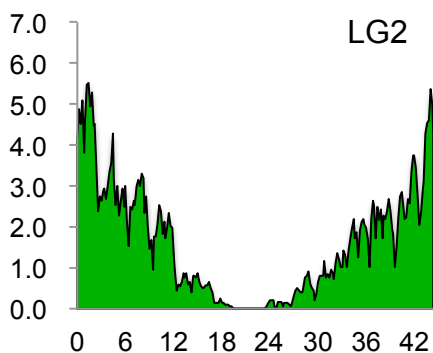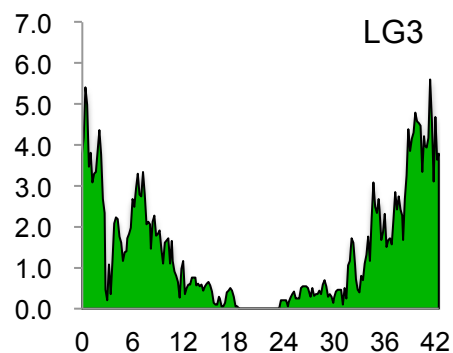

## Recombination Frequency (cM/Gene)

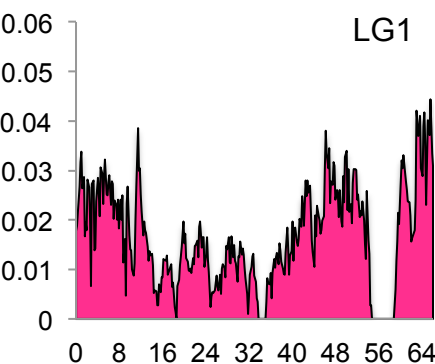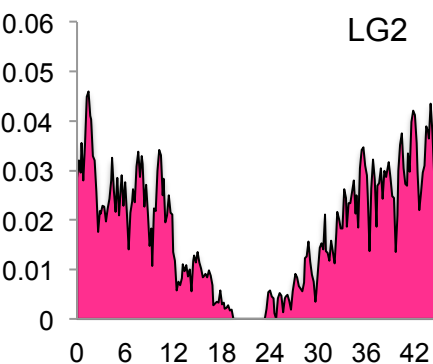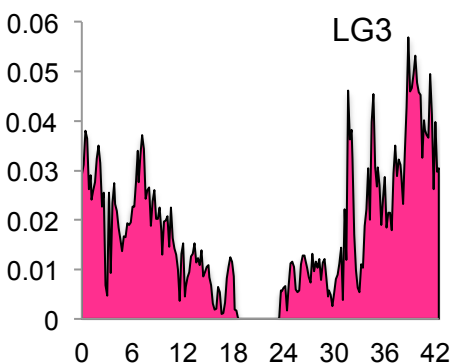

Supplementary Figure 6. An overview of the azuki bean genome.



## Gene Density (Genes/Mb)

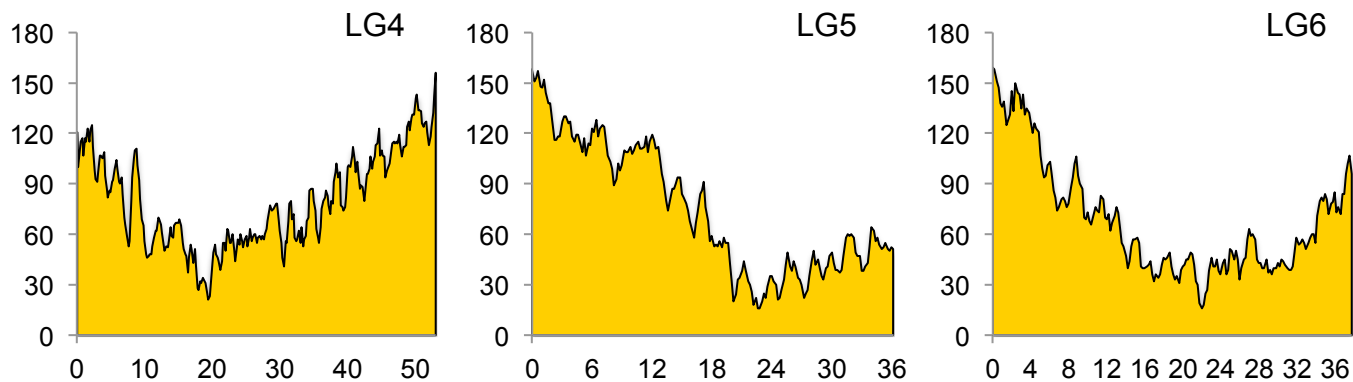

## Repeat Rate/Mb

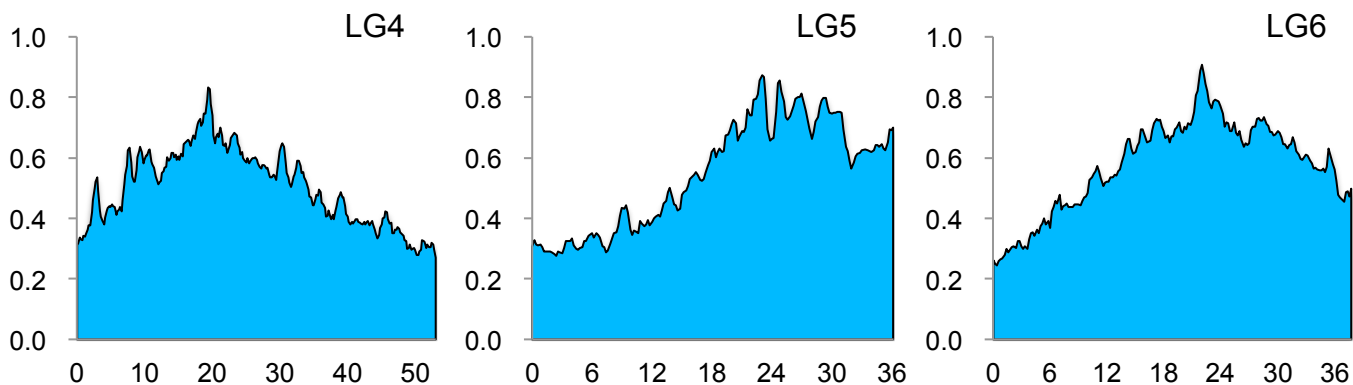

## Recombination Frequency (cM/Mb)

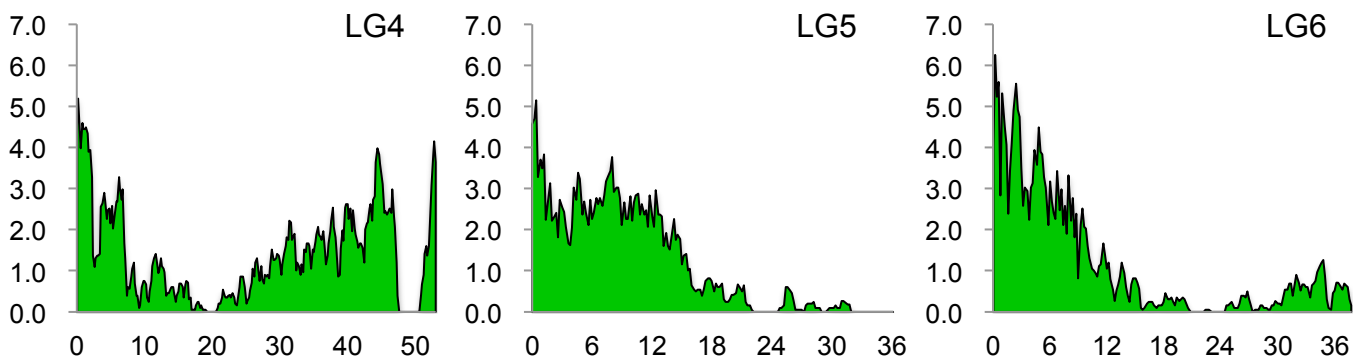

## Recombination Frequency (cM/Gene)

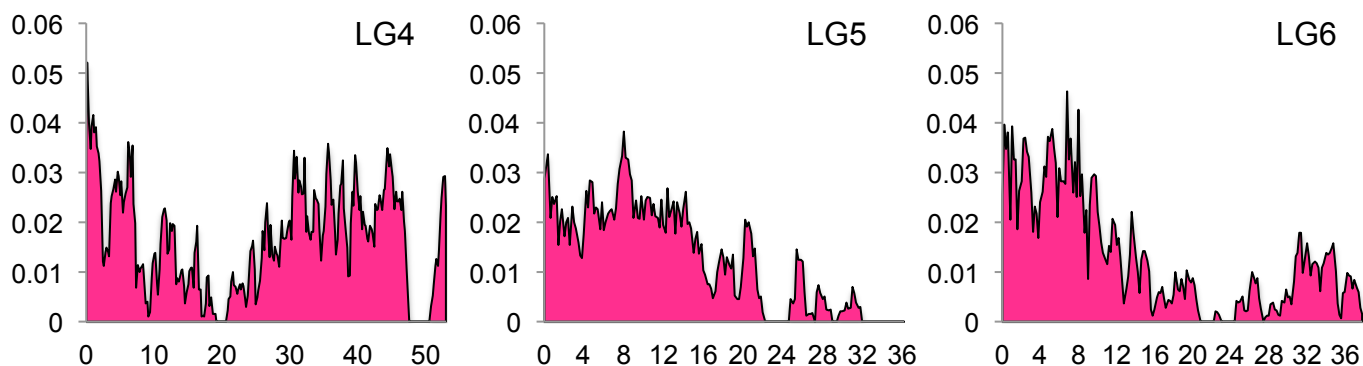

## Gene Density (Genes/Mb)

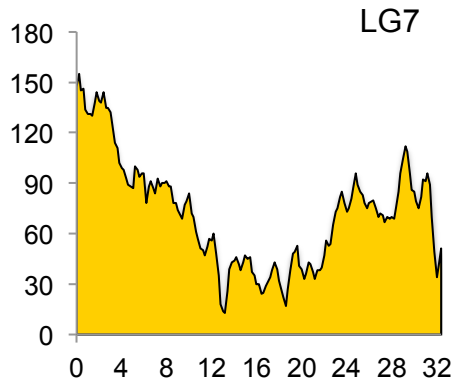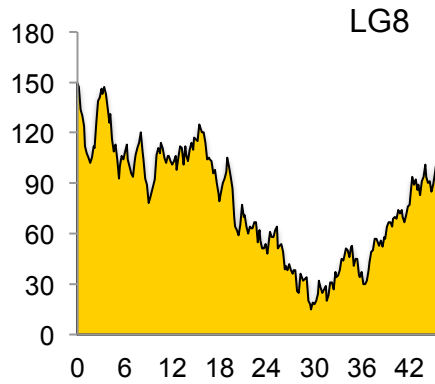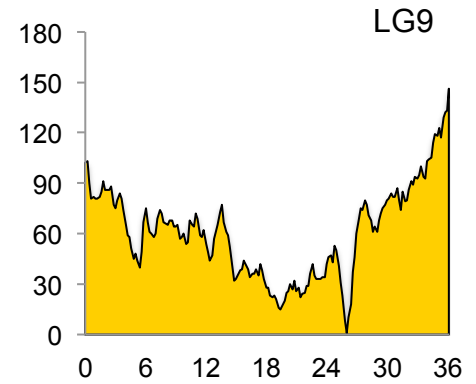

## Repeat Rate/Mb

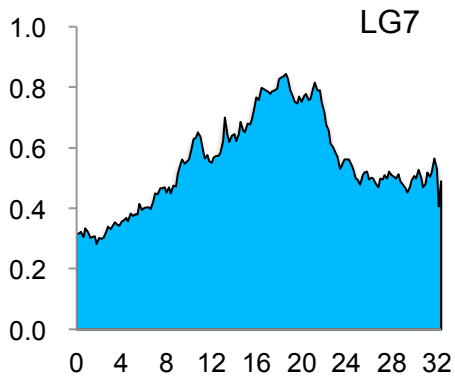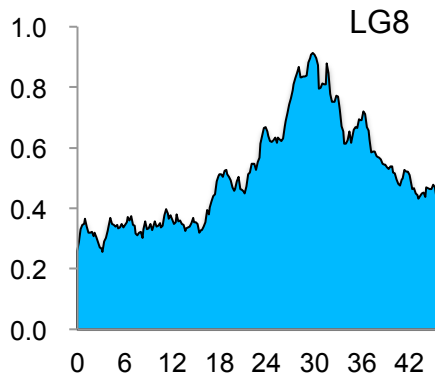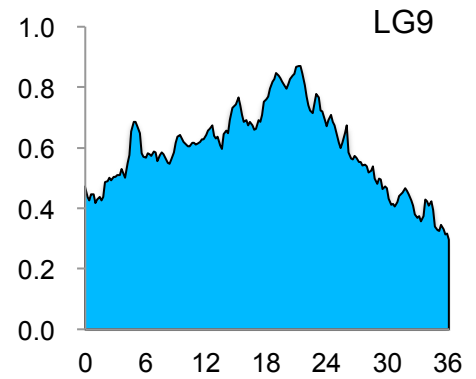

## Recombination Frequency (cM/Mb)

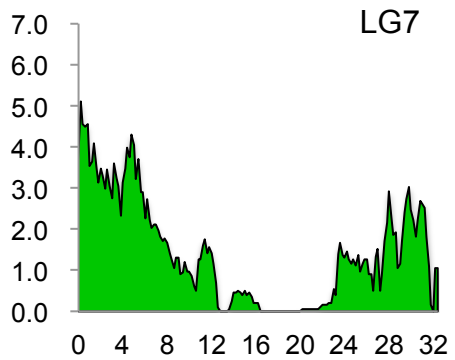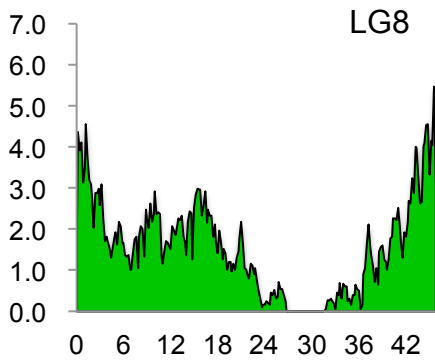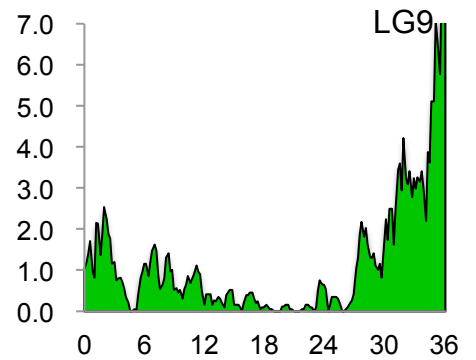

## Recombination Frequency (cM/Gene)

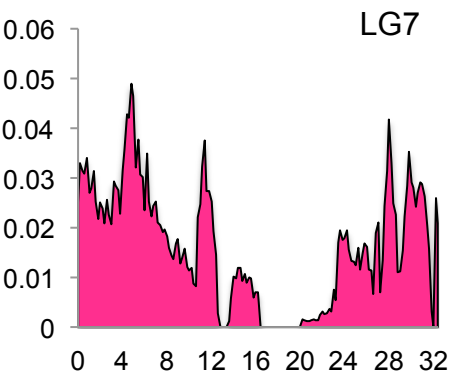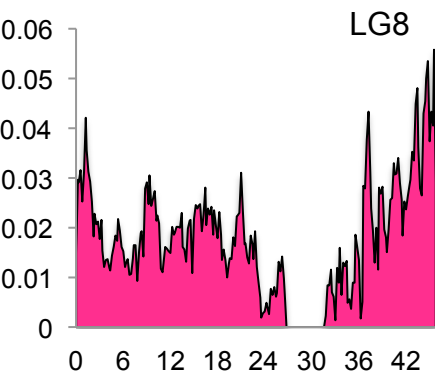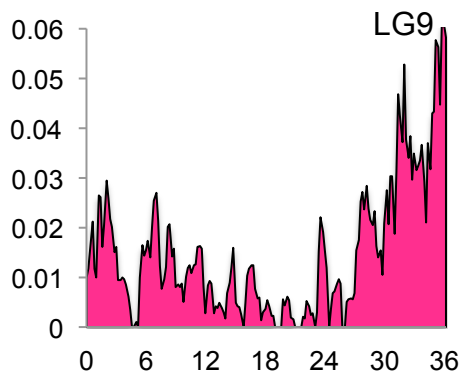

Supplementary Figure 6. An overview of the azuki bean genome. Continued.

## Gene Density (Genes/Mb)

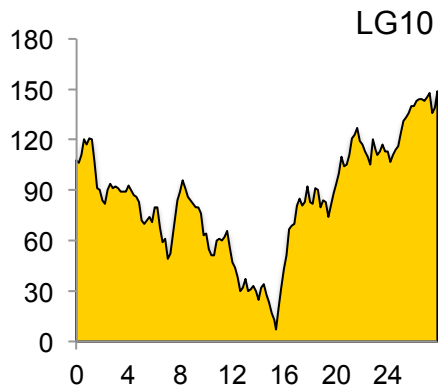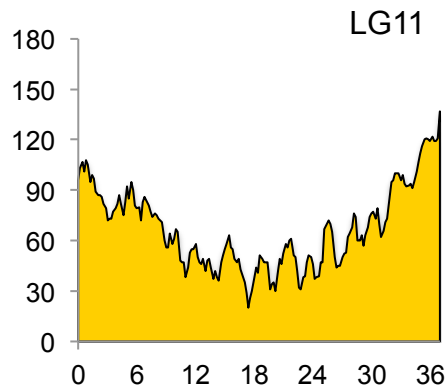

## Repeat Rate/Mb

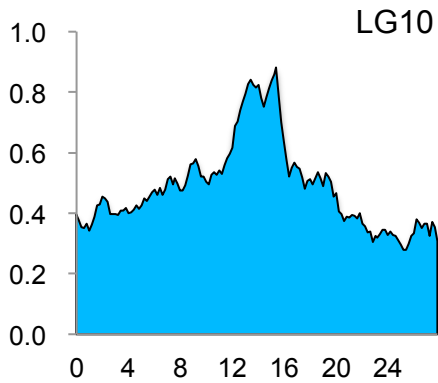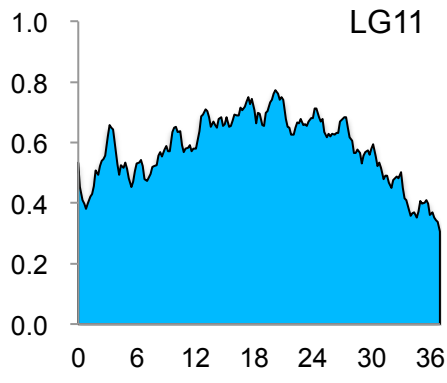

## Recombination Frequency (cM/Mb)

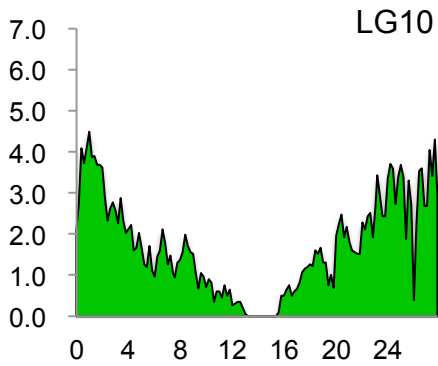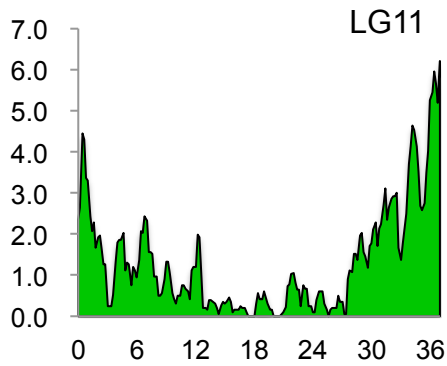

## Recombination Frequency (cM/Gene)

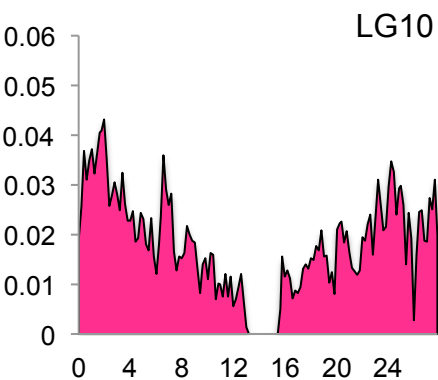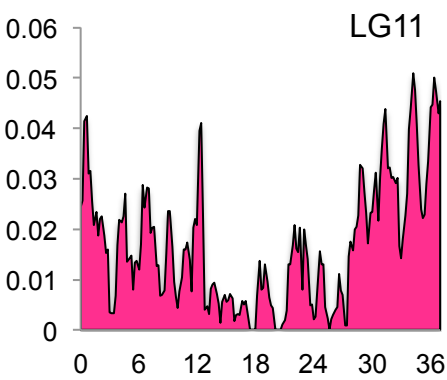

Supplement: srep16780-s1.pdf [file srep16780-s1.pdf]
